# Supplementary material for: NMDA Mediated Contextual Conditioning Changes miRNA Expression
Source: PLoS One. 2011 Sep 12;6(9):e24682. doi: 10.1371/journal.pone.0024682 (PMC3171446; doi:10.1371/journal.pone.0024682)
Supplement: Data S1 — miRNA profiling after contextual conditioning in mouse hippocampal CA1 region (XLSX) [file pone.0024682.s003.xlsx]

## Sheet: FCNormw3minandCPPpubli.txt
miR	exp1-#13 home	exp1-#14 home	exp1-#15 home	exp1-#16 home	exp2-#13 home	exp2-#14 home	exp2-#15 home	exp2-#16 home	Exp3-#9 home	Exp3-#10 home	Exp3-#11 home	Exp3-#12 home	Exp5-#17-Homecage	Exp5-#18-Homecage	Exp5-#19-Homecage	Exp5-#20-Homecage	exp6-#9-Home Cage	exp6-#10-Home Cage	exp6-#19-Home Cage	exp6-#20-Home Cage		exp1-#2 1h	exp1-#4 1h	exp1-#6 1h	exp1-#8 1h	exp2-#2 1h	exp2-#4 1h	exp2-#6 1h	exp2-#8 1h	Exp3-#2 1h	Exp3-#4 1h	Exp3-#6 1h	Exp3-#8 1h		exp1-#1 3h	exp1-#3 3h	exp1-#5 3h	exp1-#7 3h	exp2-#1 3h	exp2-#3 3h	exp2-#5 3h	exp2-#7 3h	Exp3-#1 3h	Exp3-#3 3h	Exp3-#5 3h	Exp3-#7 3h		exp1-#9 24h	exp1-#10 24h
rno-let-7b	9.25	9.33	9.25	9.36	9.13	9.22	9.55	9.17	9.29	9.11	9.47	9.4	9.24	9.2	9.38	9.34	9.42	9.28	9.43	9.06		8.98	9.21	9.11	9.41	9.91	9.95	9.96	10.26	9.23	8.97	9.16	9.32		9.34	9.26	9.31	9.1	9.07	10.03	9.95	9.26	9.26	9.14	9.32	9.16		9.26	9.06
rno-let-7c	9.05	8.89	8.93	9.17	8.79	8.92	9.35	8.89	8.95	8.82	9.07	9.27	9.08	8.95	9.11	8.85	8.96	8.81	9.11	9.14		8.46	8.81	8.85	9.28	9.77	9.61	9.62	9.88	9.08	9.12	9.04	9.12		9.04	8.79	8.73	9.1	9.19	9.67	9.89	9.07	9.17	9.03	9.11	9.1		8.89	9.02
rno-let-7d	9.43	9.48	9.38	9.41	9.31	9.36	9.5	9.41	9.46	9.3	9.36	9.66	9.37	9.12	9.73	9.52	9.55	9.03	9.58	9.59		9.37	9.64	9.54	9.55	9.97	9.79	9.43	10.54	9.41	9.6	9.6	9.72		9.51	9.58	9.52	9.52	9.23	10.47	10.21	9.5	9.61	9.43	9.57	9.66		9.51	9.27
rno-let-7e	9.55	9.63	9.48	9.55	9.51	9.41	9.72	9.47	9.58	9.73	9.38	9.57	9.55	9.4	9.73	9.52	9.72	9.52	9.28	9.71		8.27	9.81	9.47	9.7	10.5	9.64	8.97	10.7	9.08	9.73	9.58	9.67		9.52	9.23	9.57	9.67	10.02	10.65	10.53	9.63	9.34	9.66	9.66	9.67		9.47	9.42
rno-let-7i	11.73	11.72	11.81	11.71	11.56	11.69	11.94	11.68	11.75	11.83	11.75	11.68	11.62	11.92	11.77	11.65	11.75	11.6	11.87	11.73		11.48	11.8	11.85	11.79	12.25	12.65	12.6	12.64	11.59	11.71	11.72	11.85		11.85	11.76	11.79	11.48	13.19	12.58	12.45	11.8	11.47	11.73	11.74	11.94		11.78	11.53
rno-miR-100	13.24	13.3	13.27	13.22	12.92	13.32	13.5	13.21	13.31	13.33	13.12	13.31	13.06	13.27	13.31	13.36	13.16	13.34	13.3	13.2		13.02	13.16	13.08	13.17	13.68	13.47	13.52	14.46	13.24	13.25	13.55	13.32		13.04	13.07	13.15	13.21	13.58	14.56	14.21	12.98	13.32	13.31	13.27	13.46		13.13	13.06
rno-miR-101	17.81	17.99	18.02	17.76	17.93	17.64	18.2	17.73	17.75	18.37	18.07	17.56	18.26	17.75	17.78	17.79	17.72	17.82	17.95	18.07		18.28	17.91	18.05	17.77	18.74	17.8	18.24	18.85	17.33	17.56	17.35	17.53		17.67	18.22	18.19	17.95	13.11	18.76	18.87	17.61	17.7	17.59	17.52	17.38		17.87	17.4
rno-miR-103	9.06	9.09	9.07	9.11	8.99	9	9.3	8.94	9.09	8.91	9.13	9.25	8.83	9.34	9.27	8.93	9.08	9.01	9.06	9.15		8.68	9.02	9.1	9.16	9.17	9.78	9.86	9.9	9.16	9.01	9.12	9.33		9.14	8.95	9.02	9.16	9.85	9.61	9.43	8.99	9.18	8.91	9.15	9.28		9.17	9.27
rno-miR-106b	13.88	13.81	14.02	14.05	13.92	13.76	14.13	13.83	13.89	14.24	14.01	13.7	14	14.02	13.84	13.88	13.83	14.08	13.81	14.02		13.06	13.97	13.86	14.31	15.02	11.84	7.63	15.37	14.09	13.45	13.59	13.93		13.39	13.55	14.38	12.11	9.71	15.33	15.28	14.19	14.04	13.68	13.73	13.61		13.35	13.85
rno-miR-107	15.24	14.26	15.35	15.57	14.91	14.88	15.11	15.04	14.94	14.86	14.88	15.5	14.95	15.23	15	14.88	14.99	15.05	15.01	14.97		14.63	13.92	14.18	15.31	16.24	15.84	14.76	17.57	15.48	15.32	15.84	15.49		14.96	15.04	13.89	15.13	17.31	17.52	15.56	15.27	15.47	14.97	15.34	15.54		15.15	15.44
rno-miR-10a	25.49	25.92	24.11	25.11	23.97	25.59	26.39	24.83	36.6	28.97	24.66	23.62	23.45	26.6	29.13	25.42	25.9	30.52	23.36	26.42		28.05	24.4	24.36	22.33	26.32	26.21	39.31	28.45	22.71	25.12	31.06	25.51		25.28	26.53	26.7	24.65	27.16	28.33	26.16	26.68	29.87	33.84	34.17	28.62		27.01	24.67
rno-miR-122a	20.74	21.54	20.2	20.87	20.76	20.64	20.8	20.74	20.38	20.93	20.91	20.91	21.05	20.68	20.66	20.66	20.88	20.75	20.68	20.7		21.01	21.14	20.69	21.01	20.3	21.46	25.04	21.21	20.73	20.4	20.52	20.7		20.64	20.78	21.05	20.78	18.35	18.14	19.72	20.69	21	20.38	20.46	20.6		20.74	20.58
rno-miR-125a	12.12	12.04	12.06	12.03	12	12	12.18	11.96	12.18	11.88	12.13	12.12	12.01	12.04	12.17	12	12.11	12.04	12	12.08		11.98	12.29	12.12	12.19	10.56	11.52	11.38	11.47	12.28	12.05	12.32	12.17		12.25	11.95	12.06	12.14	10.42	11.48	10.3	11.95	12.26	12.01	12.18	12.16		12.21	12.08
rno-miR-125b	8.89	8.79	8.79	8.94	8.81	8.79	9.02	8.66	8.88	8.61	8.92	9.09	8.46	8.87	9.01	9.11	9.06	8.6	8.92	8.84		8.3	8.73	8.71	8.87	8.27	8.31	8.3	8.9	8.87	8.83	9.11	8.85		8.79	8.5	8.57	8.92	8.76	9.05	7.99	8.97	9.14	9.13	9.06	8.98		8.86	8.71
rno-miR-126	14.06	14.21	14.34	14.28	13.96	14.44	14.65	13.81	14.58	13.46	14.86	14.48	14.71	14.74	13.92	13.75	14.22	14.26	14.11	14.26		14.76	14.63	14.29	14.03	10.26	12.96	10.64	12.41	12.99	14.08	14.32	14.14		13.94	14.28	14.5	14.28	12.76	12.09	9.28	14	12.39	13.27	13.03	14.44		14.36	14.24
rno-miR-126*	15.78	16.11	16.11	15.87	16.01	16.11	15.58	16.15	15.77	16.29	15.89	15.96	16.16	15.93	15.84	15.93	16.23	15.99	15.58	16.11		16.19	16.08	15.84	16	11.6	15.16	14.84	15.55	16.47	16.3	15.81	15.78		15.71	16	16.16	15.99	12.69	15.37	9.66	15.36	16.87	16.2	16.4	16.16		15.97	16.08
rno-miR-128a	11.05	11.08	10.94	10.94	10.64	11.05	11.26	10.98	11.5	10.75	10.55	11.53	10.38	11.22	11.22	11.38	11	10.82	11	11.17		10.56	10.77	10.8	10.82	10.06	10.6	10.64	11.65	10.46	10.9	11.52	11.48		10.64	10.68	10.69	10.96	9.62	10.47	10.28	11.11	9.97	10.81	11.33	11.02		10.82	10.82
rno-miR-128b	13.45	14.13	40	14.49	14.47	14.05	15.26	13.89	20.3	12.5	17.11	17.9	13.42	15.1	14.87	14.76	14.39	14.72	14.13	14.3		13.9	13.99	13.89	14.01	11.48	12.2	12.9	12.82	16.36	15.96	17.83	17.34		14.08	13.86	13.8	13.3	11.27	12.03	10.64	14.05	17.72	16.62	15.99	18.82		13.9	13.77
rno-miR-130a	14.08	14.12	14.31	14.06	14.23	13.69	14.4	14.23	14.3	13.92	14.18	14.23	14.04	14.12	14.3	14.08	14.14	14.11	14.06	14.23		14.47	13.96	14.2	14.16	14.34	14.52	13.31	15.52	14.23	14.25	14.27	14.37		14.25	14.5	14.28	14.21	13.78	14	12.17	14.27	14.39	14.02	14.35	14.4		14.12	14.08
rno-miR-130b	17.99	18.16	18.07	17.96	18.03	17.96	18.01	18.06	17.96	18.25	18	18.01	18.42	17.98	17.83	17.99	18.13	18.16	18	17.88		18.56	18.14	18.28	17.88	18.28	14.68	18.05	15.31	18.4	18.08	17.99	18.06		18.08	18.48	18.42	18.27	17.35	16.03	9.04	18.29	18.78	18.26	18.36	18.09		18.21	18
rno-miR-132	9.59	9.49	9.27	9.51	9.46	9.18	9.66	9.47	9.6	9.32	9.47	9.5	9.48	9.6	9.43	9.31	9.45	9.4	9.5	9.48		9.45	9.62	9.72	9.54	9.21	9.29	9.07	9.38	9.74	9.53	9.72	9.61		9.55	9.55	9.62	9.51	9.5	9.5	9.16	9.47	9.77	9.42	9.5	9.54		9.52	9.33
rno-miR-133a	14.75	14.96	15.04	15.19	14.45	15.28	15.23	14.95	15.13	14.7	14.79	15.46	14.6	15.25	14.83	15.3	15.18	15.17	14.84	14.73		15.47	15.07	15.16	15.09	13.79	9.26	13.88	14.17	15.86	14.16	14.85	15.19		15.4	14.92	15.03	15.21	11.14	12.72	12.48	14.95	15.18	14.31	14.95	15.72		15.96	15.22
rno-miR-135a	11.25	11.61	11.67	11.3	11.43	11.39	11.54	11.31	11.61	11.55	11.26	11.44	11.12	11.86	11.38	11.48	11.48	11.51	11.27	11.5		11.61	11.71	11.5	11.24	10.67	11.64	10.88	11.22	11.74	11.83	12.75	11.9		11.46	11.64	11.38	11.75	11.25	11.2	11.09	11.43	12	11.99	11.81	12.71		11.49	11.46
rno-miR-135b	12.52	12.65	12.37	12.71	12.46	12.47	12.71	12.48	12.38	12.63	12.36	12.95	12.48	12.88	11.97	13.15	12.75	12.63	12.56	12.3		12.37	13	12.63	12.59	12.7	12.49	12.85	15.48	12.55	12.65	13.32	12.61		13.2	12.79	12.49	13.11	12.99	14.04	12.65	12.52	12.81	12.81	12.41	13.79		12.64	12.94
rno-miR-136	15.6	15.67	15.78	15.63	15.6	15.48	15.83	15.67	15.5	16.59	15.7	15.24	15.86	15.7	15.56	15.54	15.56	15.9	15.51	15.7		16.07	16.03	15.86	15.87	14.97	15.27	15.24	15.27	15.33	15.33	15.55	15.42		15.7	16.16	16.23	15.75	15	15.78	14.32	15.92	15.27	15.05	15.55	15.61		15.91	15.58
rno-miR-138	18.53	18.9	18.73	18.15	19.05	18.9	18.52	17.88	18.52	18.69	18.87	18.25	18.96	18.51	18.51	18.27	18.49	18.4	18.64	18.64		18.65	18.5	18.78	18.79	19.52	19.51	19.5	18.31	18.01	17.8	17.77	18.11		18.12	18.88	18.67	18.55	19.52	19.72	19.75	19.02	18.13	17.79	18.08	17.49		18.47	18.13
rno-miR-139	12.53	12.75	12.54	12.53	12.51	12.47	12.72	12.53	12.71	12.2	12.69	12.87	11.29	13.67	13.79	13.17	12.6	12.57	12.48	12.67		12.39	12.48	12.67	12.53	12.1	12.79	12.1	12.25	12.27	12.36	12.36	12.66		12.38	12.45	12.58	12.42	11.95	12.18	11.07	12.41	12.37	12.36	12.35	12.37		12.45	12.38
rno-miR-141	21.32	21.85	21.08	21.75	22.34	20.56	22.06	21.51	23.65	25.17	24.54	19.67	24.48	20.51	24.14	20.64	20.55	25.85	20.76	22.72		24.04	23.05	21.95	21.59	14.92	15.05	13.96	20.55	16.89	23.45	20.8	20.97		20.98	23.34	21.21	21.49	14.85	33.28	15.38	21.95	20.5	21.11	20.18	17.89		22.25	21.25
rno-miR-142-5p	28.17	26.37	27.87	26.3	26.98	26.75	27.28	26.68	27.65	26.5	27.15	26.8	26.96	26.89	26.63	27.37	27.27	26.66	27.56	26.51		26.73	26.92	27.31	27.4	27.4	27.43	27.39	28.45	27.66	27.13	26.85	27.35		25.69	26.33	27.97	26.32	28.39	28.88	28.06	27.2	26.93	26.86	27.55	26.67		26.42	26.72
rno-miR-143	12.47	13.21	13.79	13.63	12.17	13.2	14.1	13.9	13.41	12.81	13.35	13.29	12.7	13.38	13.54	13.18	13.24	12.96	13.12	13.38		13.74	13.88	12.99	12.99	12.29	12.62	12.95	13.25	12.97	13	13.14	12.69		13.59	12.96	13.83	13.11	13.82	13.25	10.64	13.76	12.96	12.95	13.41	13.47		13.89	13.49
rno-miR-144	40	40	40	40	45.43	45.54	45.62	37.9	40	40	40	40	39.95	39.95	39.95	39.95	39.95	39.95	39.95	39.95		40	40	40	40	45.22	22.69	20.57	28.35	34.35	40	40	40		40	40	40	40	45.23	45.41	45.29	45.52	40	40	35.67	40		40	40
rno-miR-145	13.34	14.13	14.2	14.27	13.25	13.66	14.82	14.31	14.31	13.13	14.54	14.3	13.66	14.52	14.03	13.65	13.84	14.13	13.72	14.04		14.24	14.02	13.73	13.66	12.84	13.68	13.48	12.68	13.23	13.32	13.82	13		13.88	13.32	14.26	13.1	11.38	12.62	10.14	14.1	13.11	13.74	13.86	14.05		14.49	14.17
rno-miR-146	16.05	16.13	15.86	15.81	15.93	15.76	15.95	16.12	15.94	16.1	15.94	15.88	16	15.9	16.02	15.9	15.94	16.01	15.93	15.93		16.43	16.42	16.28	16.16	16.72	16.4	16.3	15.9	16.29	16.06	15.73	15.85		16.34	16.37	16.4	16.37	15.91	16.2	16.72	16.1	16.13	15.94	15.96	15.85		16.3	16.03
rno-miR-148b	16.91	16.78	16.71	16.51	16.67	16.54	16.91	16.67	16.5	17.13	16.73	16.61	16.95	16.77	16.63	16.54	16.52	16.64	16.83	16.88		16.56	16.56	16.78	16.65	14.12	17	16.72	15.65	16.56	16.48	16.37	16.6		16.35	16.59	16.58	16.7	14.71	16.09	12.62	16.9	16.35	16.35	16.34	16.41		16.76	16.4
rno-miR-150	11.48	11.74	11.77	11.81	11.6	11.73	11.65	11.7	11.71	11.68	11.71	11.72	11.48	11.8	11.66	11.85	11.68	11.84	11.58	11.66		11.85	11.66	11.81	11.77	10.99	11.02	9.98	11.33	11.64	11.77	11.97	11.83		11.78	11.57	11.57	11.58	11.18	11.61	10.7	11.79	12.05	11.7	11.8	12.23		11.96	11.8
rno-miR-152	18.32	18.72	18.9	18.83	18.39	18.7	18.87	18.65	18.56	18.61	18.88	18.7	18.52	18.76	18.71	18.7	18.58	18.69	18.71	18.68		19.13	18.89	18.82	18.8	19.61	18.35	18.05	20	18.61	18.3	18.47	18.22		19.15	18.77	18.87	19.08	18.86	19.93	19.5	18.78	18.79	18.27	18.72	18.61		18.91	19
rno-miR-154	16.45	16.41	16.68	16.34	16.31	16.39	16.46	16.62	16.58	16.37	16.35	16.63	16.46	16.46	16.46	16.46	16.46	16.46	16.46	16.46		17.11	16.83	37.29	16.26	12.83	14.37	13.93	18.69	16.51	15.95	16.71	16.5		16.04	16.87	16.82	16.24	8.84	14.6	14.15	16.67	16.87	16.11	16.52	16.67		16.45	16.2
rno-miR-15b	14.87	14.72	14.74	14.69	14.51	14.66	15.21	14.57	14.43	15.18	14.88	14.65	14.96	14.86	14.47	14.73	14.74	14.72	14.77	14.74		15.19	14.59	14.84	14.72	13.99	13.72	13.59	13.96	14.55	14.47	14.42	14.39		14.8	14.69	14.58	14.53	13.34	14.12	13.68	14.3	14.92	14.48	14.35	14.34		14.76	14.57
rno-miR-16	10.08	9.94	9.87	10.18	9.98	9.88	10.1	9.99	9.96	10.09	9.97	10.07	9.77	9.93	10.08	10.31	9.9	9.93	10.03	10.19		10.04	10.13	10.17	10.11	10.27	10.68	9.79	10.59	10.16	10.08	10.18	10.05		10.52	10.03	10	9.98	10.25	10.37	9.36	10.57	10.47	10.17	10.07	10.03		9.95	9.99
rno-miR-17	15.16	15.12	15.32	15.39	15.19	15.22	15.27	15.18	15.25	15.04	15.09	15.71	15.69	15.19	14.98	15.18	15.18	15.23	15.27	15.27		15.42	15.06	15.13	15.22	14.55	14.87	14.63	15.29	15.4	14.89	15.19	15.41		15.15	15.17	15.19	15.15	14.09	15.18	14.53	15.04	16.02	14.77	15.11	15.1		15.24	15.14
rno-miR-181a	9.05	8.89	9.04	9.1	8.7	9.09	9.1	9.1	8.9	8.99	8.9	9.38	8.68	9.2	9.24	8.98	9.05	8.85	9.09	9.06		9.08	9.04	9	9.08	8.32	8.57	7.84	8.58	8.61	8.87	9.04	9.15		9.15	8.97	8.82	8.96	7.96	7.97	7.27	8.98	9.3	8.99	8.79	9.05		9.05	9.02
rno-miR-181b	12.67	12.76	12.76	12.66	12.57	12.56	12.85	12.78	12.89	12.75	12.43	12.88	12.51	12.76	12.72	12.84	12.79	12.83	12.69	12.53		12.87	12.88	12.88	12.9	11.56	11.94	11.76	12.57	12.92	12.53	13.07	12.92		12.99	12.91	12.74	12.82	10.29	12.14	11.63	13.01	12.92	12.61	12.74	12.68		12.85	12.71
rno-miR-181c	12.11	12.16	12.17	12.28	12.07	11.93	12.28	12.37	12.24	11.91	12.37	12.28	12.17	12.12	12.21	12.19	12.32	12.14	12.21	12.05		12.14	12.22	12.01	12.12	10.41	11.04	11.8	11.73	12.11	12.13	12.25	12.55		12.13	12.11	12.1	12.13	8.94	11.99	10	12.17	11.47	12.41	12.72	12.5		12.21	12.2
rno-miR-183	21.03	20.8	20.47	20.81	20.7	20.79	20.89	20.57	20.4	21.31	20.45	21.12	20.91	20.32	20.54	21.52	21.08	20.85	20.77	20.4		21.9	20.83	20.85	21.08	19.8	19.38	19.69	20.4	21.07	20.62	21.6	20.65		21.41	20.91	20.79	20.88	20.16	21.13	20.03	20.76	21.61	21.17	20.69	21.13		21	21.23
rno-miR-184	22.4	22.51	21.3	21.38	21.66	21.76	22.01	21.6	21.63	22.13	21.69	21.77	22.4	21.53	21.87	21.5	22.37	21.86	21.53	21.51		22.15	22.03	21.72	22.1	22.2	21.88	21.86	22.75	22.33	21.55	21.66	21.93		22.06	23.16	22.42	22.56	22.67	22.77	22.39	22	21.88	21.79	21.71	21.58		21.92	22.02
rno-miR-185	15.64	15.79	15.75	15.53	15.78	15.52	15.75	15.56	15.69	15.62	15.8	15.63	15.83	15.72	15.55	15.58	15.61	15.66	15.66	15.74		15.46	15.55	15.5	15.51	15.58	16.6	16.43	16.03	15.37	15.41	15.4	15.57		15.33	15.7	15.51	15.64	15.47	16.02	15.03	15.53	15.55	15.47	15.55	15.74		15.58	15.41
rno-miR-186	15.03	14.85	14.77	14.93	14.77	14.76	14.99	14.95	14.93	15.03	14.86	14.81	15.12	15.06	14.9	14.53	14.7	14.84	15.04	14.99		14.44	14.41	14.64	14.39	14.01	14.52	14.05	14.39	14.82	14.63	14.75	14.88		14.36	14.16	14.6	14.31	14.07	14.53	13.81	14.95	14.23	14.18	14.78	14.64		14.58	14.38
rno-miR-18	18.88	18.88	19.06	19.09	18.75	18.96	19.26	18.83	18.8	19.12	19.13	18.9	19.16	19.03	18.77	18.93	19	18.87	19.05	18.95		19.06	18.92	18.98	19.01	19.46	18.91	19.19	19.85	18.71	18.52	18.55	18.83		18.75	18.65	19.13	18.86	19.03	19.68	19.08	19.21	18.66	18.46	18.81	18.53		19.06	18.96
rno-miR-190	23.98	24.16	23.75	24.09	24.08	23.7	24.12	23.98	23.92	24.47	24.09	23.64	24.5	24.11	23.79	23.67	23.73	24.08	23.82	24.39		24.12	24.02	23.97	23.52	24.25	24.03	24.2	24.24	23.89	23.65	23.42	23.69		23.55	23.91	23.84	23.62	23.98	24.42	24.45	23.7	23.96	23.59	23.69	23.55		23.72	23.86
rno-miR-191	10.09	9.97	10.08	10.01	9.84	9.98	10.33	9.91	10.26	9.83	10.04	10.12	10.25	9.82	10.14	9.95	10.09	10.02	9.94	10.06		10.15	10.17	10.37	10.29	9.53	9.69	9.44	9.92	10.31	10.32	10.37	10.38		10.1	10.02	10.18	10.07	9.9	10.16	9.07	9.85	10.5	10.21	10.21	10.21		10.34	10.06
rno-miR-193	18.78	18.86	18.95	18.91	18.74	18.76	19.15	18.74	18.71	19.19	19.02	18.67	19.06	18.54	18.88	19.04	19.03	18.92	19.01	18.55		19.33	19.06	19.45	19.26	19	18.56	18.69	16.4	19.07	18.82	18.93	18.82		19.16	19.22	18.76	18.82	19.33	19.65	11.34	19.05	19.26	18.96	18.89	19.07		19.4	18.96
rno-miR-194	14.95	14.73	14.95	14.79	14.62	14.71	15.21	14.79	14.73	15.09	14.89	14.75	15.03	14.98	14.78	14.62	14.9	14.82	14.92	14.74		14.97	14.87	14.97	14.91	14.42	13.97	15.28	14.65	14.92	14.78	14.54	14.82		14.91	15.03	14.96	15	15.3	14.94	13.02	14.76	14.69	14.48	14.62	14.7		15.03	14.88
rno-miR-195	12.6	12.68	12.4	12.54	12.14	12.56	13.05	12.43	12.33	12.51	12.48	12.98	12.39	12.5	12.5	12.79	12.71	12.63	12.57	12.28		12.55	12.85	12.67	12.61	11.5	12.17	12.12	12.4	12.29	12.51	12.66	12.43		12.98	12.72	12.62	12.42	12.57	11.77	9.89	12.89	12.53	12.59	12.37	12.81		12.69	12.62
rno-miR-196a	14.4	14.71	14.25	14.19	14.25	15.3	14.3	13.84	24.77	12.4	37.71	35.21	12.37	25.92	25.92	25.92	14.37	14.37	14.37	14.37		15.32	14.8	14.69	14.56	8.35	10.4	11.27	12.13	24.31	25.32	31	25.87		14.92	15.09	14.69	15.34	10.14	11.48	8.59	18.61	23.14	37.63	24.44	37.71		14.85	14.89
rno-miR-196b	28.42	27.52	24.77	23.78	27.61	25.97	26.11	23.48	24.03	35.45	35.42	24.13	39.05	27.24	24.53	23.82	26.12	27.68	24.18	24.44		33.12	27.98	30.82	28.2	28.39	25.54	39.12	24.42	29.33	32.38	30.92	34.48		26.66	31.28	27.6	31.8	20.93	28.36	28.03	33.7	28.94	35.2	25.17	35.42		27.8	25.64
rno-miR-199a	19	19.41	19.66	19.59	18.61	19.76	19.82	19.54	19.43	19.12	19.56	19.55	19.43	19.42	19.45	19.23	19.43	19.46	19.34	19.29		19.95	19.63	18.92	19.21	20	20.16	20.07	15.77	19.37	19.11	18.88	18.84		19.68	18.96	19.59	19.39	10.5	20.51	11.67	19.63	19.25	19.04	19.39	19.41		19.86	19.62
rno-miR-19a	12.98	12.98	13.08	13.19	12.86	12.84	13.16	13.3	12.88	13.01	13.2	13.2	12.97	13.07	13.08	13.09	13.05	13.03	13.13	13		12.31	12.81	12.99	13.02	11.87	12.03	11.47	11.75	13.22	12.78	13.05	13.03		12.87	12.67	12.83	12.99	9.76	9.97	9.3	13.08	13.11	12.95	12.75	12.88		12.99	13.08
rno-miR-19b	12.91	12.8	12.95	13	12.69	12.79	13.16	12.91	13.03	12.67	13.01	13.02	13.07	12.87	12.8	12.89	12.87	12.92	12.95	12.89		12.64	12.75	12.98	12.98	12.8	12.91	12.8	12.51	12.73	12.79	12.94	13.33		12.91	12.77	12.72	12.53	12.83	13.17	12.75	12.62	12.98	12.8	12.82	12.85		12.96	12.96
rno-miR-200a	15.9	15.69	15.75	15.81	15.5	15.92	15.84	15.78	15.69	16.03	15.67	15.82	15.91	16.06	15.23	16.11	15.88	15.86	15.72	15.66		16.31	16.18	15.75	15.71	14.11	15.52	15.56	15.1	15.94	15.83	16.47	15.69		16.16	15.99	15.89	16.25	14.5	15.63	13.93	15.81	16.1	15.97	15.77	16.76		15.82	16.29
rno-miR-200b	15.2	14.62	14.31	14.56	14.08	14.92	14.31	15.63	14.05	15.35	14.27	15.35	14.75	14.77	14.18	14.93	14.89	14.92	14.46	14.35		15.27	15.48	14.67	14.79	14.31	11.01	12.8	15.65	15.29	15.1	15.8	14.75		15.85	14.95	15.08	15.76	12.07	15.64	13.41	14.71	15.62	15.35	14.99	15.89		14.52	14.24
rno-miR-200c	19.95	20.91	20.97	21.48	23.02	19.25	21.09	22.82	21.09	20.47	20.14	21.64	20.29	20.64	20.73	21.49	20.4	21.16	20.57	20.89		20.39	20.33	19.98	19.84	21.35	21.46	21.56	24.61	20.15	19.79	20.39	21.28		21.6	20.15	19.86	20.38	22.04	22.09	21.55	22.89	20.24	20	19.94	21.53		19.87	21
rno-miR-205	25.78	40	29.68	30.5	39.31	25.94	28.17	39.29	26.77	27.82	27.86	28.77	27.04	27.63	27.29	29.96	28.96	27.35	28.39	26.81		40	36.34	40	32.15	39.1	31.55	39.06	18.93	28.29	28.17	28.87	27.08		34.32	37.15	29.54	27.7	39.11	39.29	39.16	34.73	28.6	27.36	26.83	27.44		36.12	23.9
rno-miR-206	20.97	20.79	20.59	20.85	20.75	20.66	21.06	20.61	20.61	21.23	20.92	20.54	21.07	20.39	21.02	20.77	20.69	20.63	20.84	21		20.97	20.64	20.8	21.26	21.23	21.49	21.58	21.34	20.99	20.49	20.61	21		20.65	20.45	20.54	20.25	21.13	21.34	21.5	20.83	20.84	20.51	20.61	20.07		20.84	20.45
rno-miR-208	24.18	24.93	24.46	23.96	37.37	23.37	25.46	23.59	29.57	22.38	30.86	32.87	33.19	33.19	28.63	22.36	24.34	24.34	24.34	24.34		30.49	27.23	24.62	24.46	15.55	37.35	13.95	16.19	32.76	26.25	32.81	32.83		25.64	33.74	34.45	24.87	31.87	16.58	10.39	25.41	20.13	32.75	32.83	32.83		22.38	34
rno-miR-20	13.82	13.85	13.79	13.87	14.23	14.19	13.97	13.09	13.8	13.78	13.85	13.94	13.77	13.68	13.87	13.99	14.02	13.94	13.77	13.59		14.08	13.95	14.01	13.88	10.07	10.42	9.16	10.27	14.05	14	14.06	13.96		13.67	13.94	13.93	13.74	9.5	12.36	8.77	13.81	14.15	13.95	13.7	13.87		13.89	13.87
rno-miR-21	13.65	13.92	13.99	14.04	13.43	13.9	14.16	14.06	14.45	13.46	13.32	15.06	13.24	13.83	14.08	14.78	13.01	14.15	14.66	14.3		13.35	13.35	13.54	13.95	12	12.48	12.72	13.04	13.48	13.43	13.35	14.27		14.02	13.38	13.29	13.11	12.1	13.1	12.14	13.64	13.15	13.51	13.28	13.72		13.81	14.05
rno-miR-210	14.68	14.4	14.49	14.93	14.28	14.74	14.73	14.6	14.57	14.51	14.59	14.83	14.67	14.61	14.5	14.63	14.79	14.5	14.66	14.49		15.04	14.59	14.67	14.46	13.74	12.45	14.14	14.79	14.83	14.52	14.89	14.77		14.81	14.77	14.51	15.09	14.39	14.38	13.85	14.47	14.91	14.4	14.66	14.53		15.15	14.52
rno-miR-212	12.6	12.48	12.42	12.53	12.54	12.4	12.67	12.3	12.62	12.01	12.96	12.66	12.54	12.47	12.63	12.38	12.53	12.6	12.44	12.43		12.79	12.66	12.85	12.79	12.08	11.99	11.45	12.72	12.84	12.78	12.67	12.64		12.42	12.68	12.72	12.34	10.76	12.53	11.61	12.3	12.38	12.1	12.35	12.68		12.59	12.3
rno-miR-213	16.15	16.1	16.02	16.22	15.84	16.5	15.99	16.11	15.96	16.72	16.11	15.86	16.34	16.36	15.68	16.2	16.19	16.03	16.15	16.1		16.23	15.95	16.1	16.14	15.39	15.96	16.34	14.73	16	15.75	16	16.19		16.04	16.02	16.01	16.52	14.53	15.24	15.52	15.94	16.23	15.88	15.93	15.94		16.21	15.88
rno-miR-214	14.02	13.59	13.67	14.36	13.92	13.65	14.83	13.31	13.47	13.94	14.38	13.91	13.46	13.98	13.94	14.19	13.91	13.96	14.14	13.52		14.15	13.37	13.43	13.97	12.38	10.77	13.07	12.81	13.71	13.62	13.41	13.3		14.83	13.94	12.66	13.93	12.11	13.17	13	14.72	13.99	13.84	13.71	13.16		13.61	13.98
rno-miR-216	29.32	29.99	30.45	24.71	25.46	27.09	27.17	27.25	25.98	29.67	28.72	25.49	30.18	26.02	25.29	31.08	28.52	28.37	25.52	26.1		40	33.73	25.86	27.32	31.74	31.57	28.57	39.69	24	22.93	24.71	24.48		31.04	32.56	40	27.57	20.88	41.68	30.81	27.14	25.52	25.17	25.19	28.67		31.48	28.34
rno-miR-218	10.84	10.73	10.79	10.71	10.63	10.62	11.1	10.64	10.83	10.91	10.55	10.84	10.91	10.68	10.84	10.62	10.59	10.8	10.81	10.85		10.64	10.63	11.01	10.94	11.96	10.38	9.93	12.09	10.54	10.77	10.57	11.26		10.72	10.71	10.9	10.55	11.65	12.04	11.37	10.49	10.89	10.74	10.92	10.93		10.77	4.49
rno-miR-219	15.12	14.73	15.69	15.74	14.95	15.29	15.82	14.96	14.74	15.8	15.54	15.21	15.18	15.71	14.85	15.39	15.21	15.03	15.65	15.17		14.88	14.75	15.21	15.38	13.28	13.56	13.88	14.58	14.62	14.52	14.87	14.98		14.89	14.65	14.55	14.75	14.06	13.89	13.08	15.12	14.62	14.41	14.34	14.82		15.16	15.01
rno-miR-22	12.2	12.27	12.33	12.23	11.96	12.35	12.52	12.11	13.02	11.07	13.32	13	12.47	12.13	12.16	12.26	12.21	12.3	12.28	12.21		11.86	11.98	12.23	12.23	10.83	11.63	11.77	11.74	13.17	12.92	12.81	13.17		11.91	12.06	12.28	12.13	11.11	11.77	10.48	12.36	12.45	12.51	13.05	13.02		12.16	12.01
rno-miR-222	10.18	10.14	10	9.98	9.92	10.07	10.22	9.97	10.18	9.54	10.38	10.41	10	9.87	10.42	10.01	10.21	9.97	9.97	10.13		9.79	9.9	10.23	10.25	9.84	10.07	9.74	10.13	10.27	9.96	10.19	10.54		9.71	9.98	10.22	10.05	10.04	10.11	9.34	9.97	10.08	9.92	10.19	10.19		10.1	9.92
rno-miR-223	20.21	21.72	22.18	22.06	20.41	21.39	21.88	21.87	21.99	20.5	21.31	22.01	20.64	21.22	21.87	21.77	21.03	21.48	21.18	21.51		21.67	21.68	20.4	20.47	10.02	11.56	10.2	13.66	21.13	21.2	21.19	20.66		21.92	20.79	21.54	21.36	11.6	14.08	9.58	21.31	21.7	21.24	21.63	21.58		21.64	21.73
rno-miR-23a	10.24	10.57	10.37	10.57	10.13	10.72	10.59	10.2	12.06	8.81	12.32	12.4	9.92	10.16	10.89	11.04	10.22	10.55	10.51	10.44		10.46	10.43	10.47	10.39	9.44	9.58	9.23	4.16	11.68	11.75	12.21	11.99		10.36	10.35	10.46	10.31	9.33	10.11	8.22	10.39	11.92	11.67	11.9	12.18		10.45	10.49
rno-miR-23b	10.28	10.47	10.41	10.5	10.2	10.54	10.58	10.22	10.28	10.18	10.79	10.5	10.47	10.42	10.44	10.29	10.43	10.35	10.49	10.34		10.66	10.5	10.68	10.61	8.61	10.26	9.38	10.14	10.11	10.19	10.39	10.44		10.59	10.42	10.67	10.26	9.44	10.31	9.31	10.5	10.41	10.09	10.08	10.22		10.61	10.46
rno-miR-24	11.62	11.73	11.5	11.88	11.36	11.9	11.85	11.51	11.47	11.72	11.65	11.92	11.63	11.7	11.64	11.7	11.68	11.48	11.71	11.82		11.32	11.29	11.67	11.51	9.08	10.34	10.96	11.32	11.17	11.18	11.38	11.62		11.32	11.27	11.57	11.29	10.53	10.91	10.42	11.16	10.84	11.07	11.08	11.42		11.65	11.63
rno-miR-25	14.06	14.05	14.07	14.18	13.63	13.75	14.54	14.55	14.14	14.17	13.94	14.16	14.32	14.01	14.05	13.98	14.18	14.11	13.99	14.05		14.66	14.43	14.35	14.14	11.32	12.63	12.99	13.24	14.44	13.85	14.46	14.33		14.08	14.54	14.47	13.96	11.83	13.37	12.06	11.48	14.2	13.82	13.82	14.05		14.23	14.04
rno-miR-26a	10.3	10.24	10.26	10.2	10.18	10.23	10.34	10.13	10.35	10.27	10.19	10.24	10.05	10.31	10.32	10.3	10.13	10.02	10.33	10.55		10.1	10.38	10.5	10.31	8.82	9.71	9.45	9.54	10.36	10.31	10.13	10.3		10.32	10.28	10.42	10.25	9.38	9.77	9.3	10.02	10.07	10.43	10.11	10.14		10.27	10.18
rno-miR-26b	13.16	13.51	13.75	13.33	13.39	13.15	13.49	13.59	13.35	13.41	13.43	13.54	13.28	13.39	13.49	13.53	13.4	13.1	13.78	13.46		13.41	13.68	13.67	13.84	12.99	13.33	13.15	13.95	13.35	13.53	13.5	13.49		13.12	13.92	13.51	13.32	13.1	13.19	13.03	12.62	13.48	13.53	13.07	13.46		13.79	13.57
rno-miR-27a	10.87	10.75	10.91	11.04	10.53	11.16	11.11	10.7	10.8	10.89	10.99	10.92	10.79	10.93	10.74	11.09	10.9	10.84	10.92	10.85		10.93	10.74	10.96	10.95	10.18	10.34	9.73	10.65	10.44	10.6	10.51	10.83		10.96	10.76	11.04	10.95	10.46	10.64	10.13	10.61	10.42	10.19	9.89	10.83		10.65	10.97
rno-miR-27b	10.85	10.81	10.87	11.03	10.19	11.18	11.39	10.91	10.64	11.04	11.07	10.88	10.96	10.81	10.81	10.94	10.81	10.95	10.96	10.79		10.88	10.78	11.04	11	11.26	11.71	11	11.77	10.49	10.58	10.56	10.8		10.96	10.74	10.94	10.81	11.5	11.57	11.24	10.87	10.58	10.31	10.49	10.58		10.92	10.91
rno-miR-28	15.48	15.04	15.6	16.59	14.22	16.72	16.16	16.68	15.31	16.1	15.65	15.43	15.68	15.71	15.45	15.43	15.64	15.75	15.55	15.35		16.49	16.03	15.43	15.56	16.93	20.39	29.81	17.86	15.61	15.12	14.94	15.08		15.53	17.11	14.15	16.48	14.09	17.46	17.8	16.03	15.29	14.99	14.5	15.15		14.87	15.6
rno-miR-296	13.94	13.63	13.98	13.96	13.42	13.84	14.15	14.05	13.79	13.42	14.18	14.29	14.16	14.05	13.61	13.7	13.95	13.87	13.79	13.84		13.63	13.61	13.75	13.79	14.63	12.27	13.31	14.98	13.69	13.41	13.98	13.89		13.39	13.74	13.49	13.93	12.49	14.96	14.5	13.7	13.68	13.37	13.79	13.89		13.74	13.78
rno-miR-299	14.76	14.75	14.68	14.98	14.42	14.97	15.04	14.65	14.49	15.19	14.95	14.65	14.85	14.77	14.87	14.64	14.81	14.74	14.73	14.84		15.23	14.75	15.05	14.97	11.94	10.77	8.01	16.17	14.51	14.16	14.44	14.65		14.44	13.09	14.91	15.15	10.06	15.85	15.4	15.13	13.95	13.72	14.25	14.24		14.99	14.51
rno-miR-29a	11.07	11.75	11.04	10.96	11.12	10.85	11.46	11.2	11.17	11.05	11.28	11.25	11.05	11.07	11.33	11.22	11.28	11.1	11.09	11.19		10.89	10.82	11.04	11.1	11.96	10.79	10.85	12.33	11.17	11.32	40.56	11.28		10.9	10.9	11.03	10.86	10.4	12.35	11.99	11.34	11.19	11.21	11.26	11.38		10.91	10.88
rno-miR-29b	9.98	9.97	10.06	10.08	9.98	10.05	10.04	9.89	10.26	9.41	10.38	10.34	9.98	9.94	10.18	9.97	10.02	9.96	9.97	10.13		9.71	9.77	10.11	10.13	10.7	10.37	10.32	10.76	10.12	10.25	10.2	10.43		10.03	9.85	10.01	9.86	10.46	10.5	10.63	10	10.13	10.07	10.06	10.33		10.08	9.91
rno-miR-29c	12.52	12.73	12.73	12.65	12.53	12.51	12.82	12.66	12.81	12.34	12.83	12.75	12.62	12.65	12.68	12.63	12.59	12.59	12.68	12.74		12.35	12.55	12.65	12.68	12.31	12.44	12.35	13.85	12.56	12.68	12.68	12.76		12.43	12.65	12.66	12.36	11.78	13.53	13.01	12.72	12.67	12.53	12.7	12.92		12.56	12.42
rno-miR-30a-3p	13.35	13.34	13.35	13.46	13.24	13.33	13.48	13.32	13.34	13.25	13.46	13.51	13.38	13.5	13.47	13.14	13.29	13.5	13.33	13.35		13.27	13.36	13.48	13.54	14.02	13.23	13.29	14.37	13.11	13.1	13.4	13.47		13.39	13.17	12.44	13.17	13.71	14.43	14.14	13.22	12.59	12.97	13.16	13.33		13.49	13.23
rno-miR-30a-5p	10.88	10.88	10.87	10.93	10.68	11.01	10.99	10.77	10.84	10.82	10.92	11.02	10.93	10.86	10.88	10.87	10.94	10.93	10.8	10.86		10.8	10.94	11.07	11.04	11.06	10.66	7.45	12.01	10.87	10.91	10.99	11.02		11.13	10.84	10.92	10.44	11.57	11.9	11.45	11.3	10.44	10.75	10.78	11.06		11.02	10.95
rno-miR-30b	10.33	10.34	10.3	10.35	10.3	10.14	10.46	10.33	10.41	10.01	10.39	10.61	10.18	10.37	10.37	10.38	10.41	10.44	10.15	10.31		10.3	10.38	10.47	10.51	9.86	10.83	10.58	11.26	10.71	10.64	10.71	10.56		10.46	10.3	10.26	10.25	11.28	11.61	10.94	10.45	10.92	10.65	10.53	10.56		10.4	10.42
rno-miR-30c	9.5	9.58	9.47	9.56	9.39	9.48	9.61	9.5	9.54	9.32	9.59	9.74	9.39	9.51	9.58	9.6	9.48	9.68	9.53	9.41		9.42	9.56	9.67	9.6	9.4	10.22	9.5	10.18	9.94	9.76	9.81	9.73		9.62	9.47	9.45	9.46	10.85	10.34	10.3	9.66	9.81	9.88	9.76	9.69		9.51	9.55
rno-miR-30d	10.48	10.07	10.19	10.06	10.05	10.11	10.26	10.24	9.9	9.63	10.77	10.91	10.08	10.13	10.21	10.32	10.35	10.17	10.09	10.13		10.19	10.36	10.27	10.37	10.59	9.85	9.59	11.28	10.18	10.02	10.28	10.15		10.43	10.22	10.29	10.3	10.16	11.4	10.71	10.23	9.75	9.98	10.07	10.28		10.37	10.24
rno-miR-30e	13.04	13.15	13.48	13.88	13.32	13.3	13.31	13.39	13.31	13.35	13.49	13.33	13.4	13.46	13.25	13.28	13.31	13.4	13.28	13.4		14.07	13.58	13.45	13.64	13.53	11.62	14.74	14.24	13.55	13.36	13.43	13.37		12.95	14.13	13.7	13.81	11.67	14.06	11.82	12.42	13.46	13.38	13.47	13.39		13.09	12.93
rno-miR-32	22.78	22.15	23.11	21.97	22.45	21.92	22.86	22.52	22.56	22.96	22.05	22.34	22.36	22.84	22.71	21.96	22.17	22.33	22.62	22.62		23.27	22.33	23.03	22.28	22.86	22.68	22.3	21.33	22.94	22.76	22.63	22.83		22.06	23.2	23.6	22.91	21.83	21.98	23.02	21.83	22.42	22.92	22.54	22.46		22.32	22.49
rno-miR-320	14.89	14.7	14.27	14.69	15.64	17.68	12.98	17.65	14.8	14.92	14.43	14.44	14.62	14.65	14.64	14.65	14.66	14.69	14.68	14.54		15.24	14.89	14.98	15.05	17.67	16.27	16.96	21.36	15.25	15.25	14.83	14.6		15.07	14.89	14.76	14.83	16.93	17.17	18.01	17.38	15.3	15.2	14.96	14.34		13.64	14.94
rno-miR-323	12.36	12.5	12.77	12.37	12.67	13.47	12.55	11.66	12.44	12.51	12.64	12.44	12.07	12.98	12.46	12.54	13.43	13.54	13.35	11.18		10.67	12.36	12.95	13.01	13.09	13.19	13.07	12.72	12.71	12.75	12.67	12.72		11.67	12.85	12.2	12.01	13.44	12.5	13.11	13.06	12.6	12.61	12.74	12.68		12.62	12.57
rno-miR-324-3p	13.41	14.12	13.27	14.29	13.79	13.74	13.43	13.84	13.72	13.78	13.71	13.68	13.68	13.53	13.76	13.86	13.76	13.7	13.67	13.69		13.44	13.14	14.31	14.41	14.02	13.63	14.1	13.39	14.71	13.74	13.78	13.56		14.16	13.01	14.27	14.33	14.33	13.23	13.19	13.91	13.63	13.73	13.86	13.64		13.86	14.13
rno-miR-328	9.91	9.88	10.01	10	10.92	10.72	10.64	8.65	9.81	9.86	10.22	9.97	10	9.88	9.91	9.92	10.35	9.98	10.17	9.4		9.69	9.62	9.83	9.85	11.24	11.29	11.19	11.86	9.7	9.77	9.79	9.93		8.86	9.75	9.71	9.93	11.29	10.54	11.25	11.05	9.65	9.64	9.86	9.78		9.92	9.88
rno-miR-33	23.39	24.86	25.1	22.67	23.31	23.59	23.79	23.86	26.93	22.13	26.11	24.05	23.07	23.83	23.27	25.33	23.27	22.41	25.84	26.98		22.61	23.61	23.66	23.3	24.64	24.7	24.31	23.46	21.49	22.34	21.56	22.83		25.55	22.83	22.86	23.15	23.97	23.64	23.96	24.39	21.75	21.23	22.27	22.43		23.34	22.5
rno-miR-331	19.99	19.23	19.67	19.2	18.94	19.31	20.18	19.63	19.34	19.53	19.67	19.46	19.77	19.83	19.2	19.21	19.56	19.6	19.33	19.43		19.68	19.56	19.77	19.63	19.14	19.21	18.93	18.88	19.51	19.28	19.5	19.48		20.04	19.81	19.75	19.48	19.37	18.65	19.14	19.02	19.33	19.38	19.51	19.38		20.01	19.82
rno-miR-335	15.3	15.36	14.4	14.56	14.92	14.56	15	14.8	14.95	15.06	14.67	14.75	14.57	15.13	14.71	15.01	14.58	14.74	14.86	15.23		15.28	15.17	14.79	14.42	14.9	15.21	14.84	14.36	14.77	15.18	14.96	14.77		14.79	15.32	15.36	14.99	14.87	13.88	15.3	14	14.68	15.49	15.05	15.16		14.2	15.13
rno-miR-338	15.95	15.58	16.16	15.83	15.49	16.02	16.21	15.68	15.53	16.05	16.35	15.69	15.95	15.69	15.75	16.04	15.84	15.93	16.03	15.65		16.38	16.98	15.76	15.6	15.99	15.64	15.64	15.44	15.78	15.72	15.82	15.78		15.49	17.59	16.63	15.66	16.14	15.66	16.13	15.25	15.59	15.63	15.57	15.62		16.28	18.16
rno-miR-339	14.34	13.91	14.64	14.91	18.18	17.9	12.59	17.51	14.23	14.43	14.66	14.36	14.54	14.49	14.25	14.48	14.84	14.63	14.61	13.86		13.85	14.45	14.23	14.08	18.57	17.45	18.33	18.69	13.77	14.21	14.32	14.43		14.6	14.12	14.49	14.45	18.92	17.94	18.24	18.86	14.27	14.33	14.41	14.32		14.93	14.79
rno-miR-340	22.04	22.89	22.9	20.74	21.35	21.57	22.17	22.38	22.07	22.52	21.43	21.62	21.9	21.76	22.17	21.59	21.5	21.65	22	22.35		22.23	21.15	21.65	21.14	21.99	21.06	21.75	21.9	22.49	22.6	21.88	21.84		21.08	21.9	21.08	20.81	22.16	21.32	22.64	20.92	22.94	22.9	22.23	23.03		21.58	21.64
rno-miR-342	10.37	10.46	10.12	10.37	10.44	10.45	9.88	10.57	10.29	10.28	10.41	10.35	10.3	10.42	10.28	10.29	10.35	10.29	10.35	10.31		10.18	10.44	10.54	10.47	10.52	10.57	10.61	10.28	10.32	10.45	10.5	10.41		10.43	10.58	10.41	10.62	10.78	10.06	10.66	10.33	10.43	10.34	10.29	10.46		10.51	10.39
rno-miR-34a	14.57	14.35	14.42	14.79	18	19.97	12.69	17.77	14.26	14.74	14.5	14.66	14.34	14.92	14.25	14.81	14.83	14.39	14.57	14.45		14.74	13.98	14.59	14.66	17.26	18.75	19.56	17.99	14.6	14	14.66	14.42		14.38	14.29	14.1	14.34	18.35	17.84	17.91	17.92	13.96	14.36	14.36	14.57		14.77	14.9
rno-miR-34c	19.94	19.78	19.68	19.82	22.8	22.45	22.6	17.85	19.81	20.12	19.94	19.47	20.07	19.66	19.8	19.59	19.43	19.66	20.26	19.86		19.64	19.02	19.77	19.71	22.89	23.02	23.38	16.44	19.95	19.81	18.84	19.59		19.47	19.05	19.85	19.37	17.04	15.79	16.92	22.35	19.82	19.75	19.57	18.99		19.69	19.81
rno-miR-365	16.58	17.06	16.95	17.05	16.92	16.78	17.21	16.6	16.81	17.31	16.74	16.82	16.74	17.06	17.01	16.76	16.62	16.65	17.15	17.24		16.96	16.87	17.05	17.04	16.72	16.91	16.64	16.25	16.96	17.11	16.62	16.63		16.99	16.86	17.17	16.94	16.42	15.86	17.3	16.01	16.56	16.89	16.82	16.33		16.92	16.79
rno-miR-433	13.39	13.46	13.4	13.27	14.95	14.73	11.86	15.32	13.42	13.38	13.39	13.36	13.36	13.43	13.57	13.26	13.48	13.47	13.22	13.45		13.19	13.58	13.46	13.32	13.85	15.02	14.83	13.93	13.43	13.68	13.38	13.45		13.41	13.61	13.4	13.64	13.65	13.89	14.19	15.49	13.64	13.35	13.7	13.79		13.42	13.36
rno-miR-448	25.94	25.72	26.09	24.96	25.84	25.16	25.55	25.94	25.93	25.47	26.04	25.2	25.59	25.9	26.28	24.97	25.59	25.47	25.59	25.8		25.32	25.3	25	25	25.42	26.08	25.6	25.62	27.68	25.15	25.03	25.28		24.7	26.1	25.71	25.71	14.21	25.5	26.17	25.3	24.86	26.33	26.04	25.75		25.38	25.28
rno-miR-449	21.04	21.01	20.69	21.3	20.73	21.07	21.36	20.75	20.62	21.44	20.98	21.09	21.59	20.87	20.45	21.26	20.42	20.52	21.59	22.01		21.15	21.06	21.03	20.77	21.14	20.99	20.7	20.68	21.15	21.07	21.82	20.98		21.14	20.74	20.78	20.75	21.35	20.73	21.22	20.91	20.8	21.33	21.13	21.26		21.23	21.32
rno-miR-92	15	14.89	14.88	15.11	16.87	17.19	13.43	15.99	14.81	15.17	14.96	15	15.01	15.02	14.87	15.05	15.33	15.15	14.84	14.71		15.87	15.84	15.4	15.46	13.72	13.45	17.03	17.06	15.51	15.33	15.36	15.06		16.12	15.52	15.4	15.66	17.99	16.64	13.44	14.31	15.72	15.4	14.9	14.93		15.64	15.45
rno-miR-98	19.14	19.47	19.32	18.93	19.84	18.66	19.24	19.21	20.35	21.62	18.53	18.43	19.35	19.7	19.08	18.83	18.55	19.38	20.3	19.09		19.49	18.94	18.97	18.53	17.89	19.43	18.49	18.38	19.18	19.33	18.9	19.43		18.29	19.07	19.34	18.98	18.5	17.68	20.12	18.06	17.79	19.91	19.36	17.72		18.71	18.98
rno-miR-99b	12.63	12.72	12.83	12.62	13.04	12.69	12.49	12.55	12.59	12.75	12.7	12.78	12.73	12.71	12.61	12.73	12.71	12.68	12.72	12.66		12.52	12.64	12.84	12.84	12.6	12.56	12.69	12.83	12.67	12.79	12.64	12.65		12.78	12.76	12.8	12.73	13.38	12.3	13.42	12.51	12.54	12.27	12.7	12.5		12.85	12.52
rno-let-7a	11.83	11.69	11.75	11.71	11.8	12.03	11.09	12.38	11.92	11.46	11.9	11.79	11.7	11.64	11.95	11.73	11.89	11.54	11.66	11.94		11.01	11.81	11.73	11.8	12.5	12.39	12.12	11.86	11.92	12.32	11.13	11.56		11.73	12.2	11.81	11.64	12.24	11.85	12.64	12.25	11.64	11.25	12.08	11.87		10.01	11.74
rno-let-7f	15.01	14.99	14.86	14.92	15.58	14.52	15.57	14.38	14.91	14.93	14.88	15.12	15.07	14.93	15	14.75	14.82	15.12	14.8	15.01		14.26	14.75	14.93	15.2	15.25	15.75	15.99	15.38	15.39	40.73	16.07	15.11		14.79	15.01	14.94	14.95	15.97	15.75	15.66	15.59	15.49	15.8	15.88	15.47		14.78	15.26
rno-miR-124a	9	8.83	9.19	8.8	9.54	9.25	8.24	9.1	8.91	8.74	9.21	9	8.95	8.92	8.95	8.99	9.07	8.87	8.92	8.94		8.13	8.75	9.21	9.07	9.42	9.51	9.28	9.44	8.73	8.91	8.85	8.99		9	8.83	9.03	9.25	9.55	9.17	9.62	9.42	8.63	8.82	8.87	9.11		8.95	9.01
rno-miR-127	9.11	8.99	9.14	9.06	9.12	9.04	8.78	9.36	9.02	9.1	9.13	9.1	9.34	9.2	9	8.81	9.24	9.21	8.93	8.93		8.82	8.85	8.91	9.15	8.48	9.32	9.48	9.17	8.92	9.02	9.04	9.06		9.01	8.94	8.98	9.17	9.49	8.68	9.49	9.02	8.84	8.55	9.08	9.09		9.14	9.05
rno-miR-134	16.14	16.27	16.21	16.17	16.98	17.38	15.55	15.64	16.14	16.3	16.23	16.17	16.34	16.08	16.17	16.21	16.59	16.35	16.08	15.85		16.55	16.23	16.21	15.98	16.61	15.12	16.41	16.95	16.36	16.19	16.55	16.36		16.54	16.41	16.32	16.53	17.08	16.27	17.25	16.89	16.39	16.41	16.39	16.38		16.4	16.23
rno-miR-137	19.91	20.02	19.76	19.27	19.95	19.24	19.93	19.72	19.98	19.77	19.8	19.41	19.78	19.42	20.22	19.53	19.57	19.68	19.69	19.89		19.58	19.83	19.84	19.65	20.37	20.54	20.62	19.71	19.82	20	19.67	19.97		19.56	20.15	20.2	19.87	20.37	19.67	20.54	19.53	19.77	20.1	19.98	19.62		19.46	19.33
rno-miR-140	17.57	17.74	17.74	17.46	25.83	23.07	15.72	25.8	17.67	17.82	17.59	17.47	17.61	17.81	17.56	17.64	17.47	17.56	17.81	17.81		17.81	17.78	17.74	17.6	22.86	26.31	26.15	25.65	17.95	17.93	17.81	17.71		17.52	17.88	17.83	17.49	26.3	17.94	22.5	25.65	17.91	18.12	17.91	17.75		17.72	17.52
rno-miR-142-3p	19.51	19.66	19.22	19.48	19.45	19.33	19.61	19.34	19.5	19.64	19.35	19.41	19.72	19.43	19.47	19.22	19.15	19.54	19.5	19.67		19.21	19.41	19.39	19.21	19.46	19.79	19.79	18.57	19.33	19.49	19.23	19.51		18.96	19.3	19.46	19.09	19.34	18.45	19.85	18.89	19.22	19.67	19.65	19.25		19.24	19.2
rno-miR-153	18.04	18.1	18.14	18.1	18.11	17.68	18.34	18.24	18.21	18.33	17.86	18.06	18.12	18.15	18.07	18.03	17.96	18.05	18.18	18.18		17.89	17.97	18.13	17.96	18.35	18.04	18.54	17.49	18.16	19.11	18.03	18.09		17.84	18.12	18.15	18.15	18.79	17.69	18.48	18.12	18.16	18.31	18.19	18.06		18.04	18.13
rno-miR-187	18.02	17.72	18.16	17.87	21.95	18.8	16.42	19.29	18	17.99	17.67	18.15	17.79	18.29	17.65	18.17	18.42	18.37	17.57	17.66		17.8	18.07	17.62	17.89	22.9	25.85	18.95	18.54	18.34	18.63	18.82	17.97		19.26	18.3	17.94	17.77	18.64	17.78	19.22	19.06	18.35	18.49	17.86	18.38		18.01	17.9
rno-miR-192	18.69	18.68	18.71	18.82	27.26	26.95	17.71	17.73	18.7	18.87	18.69	18.69	18.74	18.75	18.65	18.75	18.78	18.86	18.71	18.57		19.12	18.99	19.07	19.04	17.95	19.35	18.91	18.19	18.9	18.95	18.63	18.57		19.27	18.88	18.95	18.79	18.26	18.86	27.64	21.85	18.28	18.91	18.74	18.53		18.88	18.87
rno-miR-203	19.98	20.02	20.05	20.27	19.91	20.16	20.19	19.92	20.13	20.09	20.04	20.1	20.06	20.14	20.06	20.01	20.08	20.28	19.97	19.97		20.2	20.21	19.89	20.03	20.38	20.2	20.18	19.89	20.08	20.28	19.79	19.94		20.38	20.1	20.4	20.26	20.4	19.85	20.57	19.71	20.2	20.74	20.33	20.45		20.21	20.11
rno-miR-204	15.87	15.82	15.9	15.39	17.55	17.14	14.09	19.7	15.93	15.71	15.59	15.74	15.76	15.93	15.73	15.62	15.65	15.56	15.81	16.03		15.63	15.81	15.64	15.58	17.58	17.93	20.08	18.5	15.67	15.91	15.71	15.68		15.88	15.83	16.02	15.9	17.56	16.7	22.78	19.56	15.73	16.32	16.11	15.99		15.72	16.01
rno-miR-221	10.72	10.59	10.71	10.47	10.92	10.74	10	11.05	10.64	10.57	10.95	10.41	10.7	10.55	11.09	10.27	10.53	10.54	10.69	10.73		10.08	10.12	10.72	10.79	10.62	11.03	11.2	11.26	10.05	10.44	10.24	10.67		10.19	10.5	10.73	10.38	11.7	10.8	11.43	11.1	10.03	10.18	10.5	10.3		10.31	10.18
rno-miR-324-5p	14.13	13.63	13.59	14.16	14.55	14.64	12.81	14.37	13.72	13.93	14.01	13.83	13.93	13.91	13.76	13.86	13.89	13.86	13.85	13.84		13.38	13.5	13.53	14.19	14.71	14.76	14.95	14.52	13.59	13.8	13.79	13.83		14.06	13.62	13.68	13.57	14.86	14.13	14.74	14.42	13.59	13.64	13.78	13.75		14.13	13.95
rno-miR-431	40	40	40	40	43.24	39.91	39.25	39.79	40	40	40	40	40	40	40	40	40	40	40	40		40	40	40	40	44.05	47.1	43.19	44.05	40	40	40	40		40	40	40	40	46.66	43.66	43.58	41.14	40	40	40	40		40	40
rno-miR-9	8.88	8.76	8.8	8.76	8.89	9	8.36	8.99	8.79	8.9	8.8	8.75	8.75	8.82	8.81	8.8	8.79	8.72	8.83	8.86		8.4	8.67	8.74	8.66	9.14	8.84	9.27	8.94	8.65	9.1	8.74	8.89		8.73	8.82	8.68	8.73	9.7	8.65	9.63	9.37	8.91	8.78	8.99	8.98		8.65	8.49
rno-miR-99a	13.51	13.62	13.74	13.62	13.43	13.92	13.57	13.49	13.51	13.69	13.74	13.58	14.27	13.57	12.9	14.12	13.49	13.54	13.8	13.64		12.98	13.14	13.46	13.32	12.92	14.07	13.99	13	13.07	13.25	13.23	13.62		13.25	13.27	13.51	13.34	13.87	13.2	13.81	13.6	12.95	13.09	13.31	13.29		13.5	13.35
rno-let-7d*	11.12	11.01	11.14	11.17	11.67	11.33	10.64	10.94	10.89	11.09	11.55	11.04	11.33	11.24	10.69	11.28	11.17	11.04	11	11.23		11.02	11.03	11.22	11.18	11.29	11.25	11.2	11.03	11	10.99	10.92	10.9		11.21	11.08	11.09	11.11	11.39	10.67	11.52	11.04	11.2	10.9	10.96	10.81		11.19	11.29
rno-miR-101b	17.25	17.3	17.18	17.02	19.48	17.45	16.71	16.48	17.15	17.4	17.31	16.97	17.16	17.27	17.24	17.07	16.98	17.04	17.32	17.43		17.11	17.38	17.52	17.22	20.26	18.24	19.91	17.67	16.83	17.69	17.07	17.27		17.31	17.25	17.57	17.2	19.31	18.8	20.38	16.83	17.09	17.66	17.38	16.77		17.16	17.2
rno-miR-10b	21.96	21.59	21.97	22.18	21.94	21.96	21.28	22.87	22.01	22.24	21.55	21.97	21.28	22.43	21.84	22.42	21.77	21.91	22.06	21.93		22.75	22.37	21.77	21.98	23.84	22.07	22.83	22.28	22.5	22.88	22.53	22.24		22.25	22.55	22.45	22.04	23.28	22.84	22.72	22.58	23.02	23.25	23.4	22.02		21.92	22.08
rno-miR-129	11.79	11.76	11.84	11.97	12.23	13.49	10.58	12.96	11.52	12.01	11.92	11.98	11.99	11.92	11.76	11.74	11.89	11.91	11.82	11.77		11.42	11.62	11.83	11.79	12.85	12.72	13.99	15.01	11.64	12.08	11.9	11.65		11.9	11.82	11.78	12.06	13.27	13.48	14.23	15.04	11.66	11.62	12.27	12.2		11.93	11.94
rno-miR-129*	14.11	14.04	13.86	13.7	14.72	13.51	13.37	14.6	14.03	14.07	13.77	13.88	13.77	14.16	13.75	14.04	13.84	13.82	13.98	14.06		13.55	14.12	14.06	13.75	14.84	14.76	15.3	14.82	14.19	14.42	14.37	13.82		13.68	14.05	14.2	14.27	14.96	14.53	15.54	14.71	14.29	14.84	14.19	14.42		13.6	13.98
rno-miR-140*	14.98	14.96	14.97	14.95	15.32	15.4	14.8	14.44	14.98	15.12	15	14.83	14.79	15.16	15.03	14.89	14.99	14.89	15.03	14.93		14.97	15.22	15.08	14.98	16.05	15.69	15.27	14.95	15.11	15.35	15.15	14.92		15.12	15.06	15.1	15.09	16.04	15.31	16.34	15.48	15.13	15.36	15.03	14.96		15.17	14.89
rno-miR-151	16.2	16.12	16.22	16.23	17.4	17.21	14.82	17.59	16.13	16.3	16.21	16.16	16.3	16.16	16.2	16.19	16.2	16.24	16.3	16.1		16.32	16.13	16.21	16.2	17.8	17.72	17.62	17.9	16.36	16.28	16.26	16.28		16.35	16.1	16.19	16.22	19.77	10.84	19.39	17.26	16.35	16.39	16.34	16.16		16.26	16.47
rno-miR-151*	15.35	15.39	15.54	15.63	15.04	15.81	16.05	15.07	15.34	15.46	15.61	15.53	15.73	15.53	15.23	15.4	15.26	15.47	15.61	15.52		15.23	15.31	15.26	15.27	15.12	15.74	15.59	15.52	15.16	15.11	15.13	15.37		15.39	15.09	15.25	15.19	15.42	14.63	15.29	15.65	14.89	15.08	15.26	15.26		15.35	15.33
rno-miR-20*	22.42	22.11	22.29	22.56	22.17	22.45	22.62	22.03	22.56	22.68	22.01	22.23	22.41	22.41	22.14	22.38	22.22	22.12	22.57	22.44		22.23	22.06	21.84	22.45	22.44	22.31	22.07	22.04	22.61	22.64	22.58	22.66		22.46	22.05	21.83	22.18	22.51	22.28	22.91	22.27	22.67	22.77	22.79	22.1		22.27	22.42
rno-miR-211	18.09	17.86	17.85	17.53	18.17	17.58	17.89	17.61	17.94	17.96	17.81	17.64	17.72	17.91	17.79	17.84	17.66	17.76	17.78	18.09		17.81	17.84	17.82	18.14	18.44	18.37	18.5	17.82	17.8	18.39	18.09	17.72		16.91	18.07	18.5	18.1	18.73	18.4	19.01	17.47	17.95	18.46	18.38	17.88		17.28	17.55
rno-miR-217	23.18	22.82	22.71	22.59	22.87	22.3	23.03	23.08	23.16	23.5	22.56	22.35	22.57	22.9	22.86	22.93	22.64	22.54	22.82	23.35		23	22.98	23	23.02	23.6	23.15	22.88	21.9	23.73	24.01	23.29	22.95		22.47	23.04	22.53	23.02	23.19	22.5	23.69	22.24	24.32	24.27	23.6	23.08		22.77	23.1
rno-miR-290	20.24	19.92	19.91	20.1	19.99	19.77	20.55	19.8	20.24	20.35	19.89	19.79	19.77	20.09	20.18	20.11	19.99	19.97	19.94	20.23		20.19	20	19.88	20.18	20.17	20.21	19.86	19.34	20.83	20.7	20.09	20.21		20.2	20.21	19.67	20.17	20.33	19.74	20.49	19.7	21.04	20.96	20.67	20.13		20.01	20.12
rno-miR-291-3p	23.3	22.64	22.82	22.66	23.17	22.42	23.13	22.63	23.13	23.61	22.5	22.45	22.72	22.66	23.03	22.94	22.68	22.6	22.83	23.29		23.06	22.77	22.92	23.15	23.37	22.88	23.25	22.35	24.04	23.77	23.23	23.04		23.28	22.75	22.57	23.38	23.5	22.89	23.47	22.64	24.44	24.33	23.86	23.38		22.83	22.91
rno-miR-291-5p	18.2	17.67	17.73	18.25	17.46	17.8	18.73	17.85	17.8	18.14	17.83	18.04	17.61	18.01	18.12	18.03	17.84	17.76	17.81	18.38		17.99	17.32	17.24	17.82	17.73	17.63	17.63	17.65	18.48	18.43	18.07	18		18.59	17.08	17.04	17.53	18.12	17.49	18.14	18.09	18.99	18.59	18.4	18.12		17.87	18.08
rno-miR-292-3p	21.91	21.78	21.9	21.94	21.9	21.53	22.23	21.83	21.92	22.2	21.81	21.7	21.52	21.98	22.21	21.87	21.76	21.69	22.1	21.98		21.93	21.57	21.78	22.01	22.07	22.09	21.66	21.33	22.68	22.35	22.07	21.98		22.15	21.86	21.31	21.98	22.43	21.46	21.93	21.82	22.64	22.8	22.35	22.09		21.83	21.96
rno-miR-292-5p	25.03	24.21	24.36	24.35	24.86	24.04	24.8	24.18	24.33	25.09	23.94	24.76	23.91	24.38	25.31	24.52	24.54	24.01	24.64	24.7		24.82	24.21	24.75	24.4	24.51	24.41	24.81	24.52	25.4	25.55	25.07	25.25		24.75	24.67	24.33	24.91	25.38	23.72	25.08	24.05	26.05	26.15	25.3	24.93		24.33	24.67
rno-miR-297	24.65	23.82	23.78	24.4	24.82	23.67	24.28	23.86	24.93	24.73	23.31	24.15	23	24.62	24.39	25.77	23.77	23.22	25.68	25		24.35	23.35	23.36	23.41	24.26	23.41	24.17	24.26	25.6	25.47	24.5	24.75		24.54	23.98	22.59	23.87	23.85	24.77	23.22	24.71	25.62	25.53	25.1	24.28		23.19	23.76
rno-miR-298	20.56	20.41	21.09	20.19	20.22	20.28	20.99	20.6	21.17	20.05	23.12	19.73	20.56	20.67	20.33	20.55	20.46	20.67	20.38	20.6		20.23	20.39	20.21	20.25	20.53	20.16	20.47	19.87	19.35	19.37	20.42	19.78		20.1	20.94	21.06	20.45	20.39	19.62	20.15	20.33	18.7	19.1	19.48	20.34		20.88	20.59
rno-miR-300	15.78	15.76	15.83	15.8	15.91	16.11	16.44	14.95	15.73	15.75	15.94	15.81	15.75	15.88	15.76	15.71	15.75	15.67	15.81	15.89		15.47	15.39	15.34	15.61	15.51	15.61	16.21	15.31	15.55	15.46	15.56	15.85		15.33	15.4	15.42	15.72	16.32	14.93	16.25	15.87	15.45	15.45	15.62	15.63		15.7	15.7
rno-miR-301	16.06	15.77	15.83	15.6	17.46	18.24	14.34	16.46	15.91	16.09	15.78	15.55	15.81	15.95	16.01	15.57	15.61	15.85	15.99	15.87		16.04	16.09	16.08	15.72	17.65	17.64	17.49	16.63	16.1	15.7	15.63	15.81		15.17	16.09	16.29	16.11	17.98	16.87	19.64	16.96	16.01	16.35	15.99	15.82		15.85	15.75
rno-miR-31	14.79	14.74	14.74	14.33	15.65	15.76	13.47	15.05	14.45	14.62	14.69	14.84	14.92	14.6	14.37	14.76	14.8	14.66	14.56	14.57		14.49	14.69	14.53	14.34	14.89	15.46	14.5	14.72	14.34	14.27	15.01	14.5		14.67	14.9	14.63	15.09	16.51	14.38	15.02	15.08	14.53	14.64	14.79	15.07		14.62	15.1
rno-miR-322	16.85	17.1	17.38	17.55	23.05	19.89	15.35	26.26	17.02	17.39	17.19	17.25	17.3	17.26	17.13	17.22	17.37	17.53	17	17.07		17.32	17.12	16.83	17.03	19.94	23.84	26.2	21.82	17.44	17.44	17.2	16.99		19.72	17.29	17.21	17.41	23.59	26.03	22.8	25.98	17.32	17.52	17.52	17.58		17.4	17.42
rno-miR-325	18.87	19.08	19.03	18.95	18.76	18.96	19.47	18.69	18.95	19.18	19.04	18.81	19.08	18.96	18.82	19.02	19	18.86	18.97	19.06		18.95	18.59	19.1	19	19.09	18.98	18.83	18.45	18.8	18.76	19.05	18.88		18.78	18.53	18.83	18.91	19.27	18.6	19.28	18.47	18.7	18.81	18.93	18.88		19.04	18.51
rno-miR-326	19.97	19.89	19.91	19.96	21.94	21	18.32	24.82	19.84	20.02	19.95	19.97	19.93	19.93	19.85	20.13	20.14	19.97	19.71	20.04		19.89	19.82	20.04	20	20.8	18.89	21.15	30.12	20.04	20	19.98	19.93		20.27	20	19.9	20.2	22.68	20.89	22.16	22.2	20.09	20.02	20.12	20.34		20.26	20.15
rno-miR-327	23.05	22.63	22.3	22.33	21.03	23.24	25.12	23.37	22.33	22.96	22.21	22.86	21.59	22.38	24.06	23.17	22.43	22.73	22.11	22.96		23.79	23.02	22.77	22.73	24.19	22.21	24.15	22.11	23.08	23.42	23.27	23.08		22.63	23.27	21.57	23.05	25.24	20.43	21.74	22.34	24.21	23.87	22.99	22.39		21.98	22.75
rno-miR-329	15.01	14.93	14.84	14.8	14.39	14.56	15.85	15	14.88	15.06	14.89	14.79	14.96	14.94	14.87	14.77	14.68	14.83	14.88	15.17		14.89	14.45	14.93	14.61	13.57	14.46	15.45	14.17	14.6	14.76	14.79	14.87		14.42	14.61	14.76	14.94	14.61	13.74	14.33	13.87	14.56	14.67	15.08	14.73		14.76	14.8
rno-miR-330	14.48	14.7	14.91	14.52	14.68	14.78	14.34	14.72	14.54	14.72	14.66	14.69	14.53	14.65	14.7	14.69	14.68	14.62	14.58	14.67		14.6	13.92	14.54	14.41	14.63	15.11	14.97	14.92	14.21	14.4	14.62	14.78		14.87	14.54	14.42	14.57	15.2	13.38	15.11	14.79	14.42	14.1	14.69	14.68		14.65	14.69
rno-miR-333	23.26	22.79	22.72	22.46	23.5	22.07	22.4	23.96	23.61	23.28	22.26	22.47	22.24	22.82	23.63	22.79	22.43	22.22	23.1	24		23	22.86	22.81	22.74	23.47	23.49	23.84	22.94	24.19	24.18	22.95	23.02		22.83	22.99	22.68	23.05	23.59	22.24	24.31	22.36	24.08	24.29	23.79	22.76		22.35	22.78
rno-miR-336	25.08	24.08	25.03	24.69	24.48	24.71	24.64	24.74	24.84	24.08	25.11	24.9	24.38	24.52	24.78	25.03	24.57	24.5	24.6	25.02		24.91	25.43	25.38	24.81	26.18	24.68	25.41	26.15	24.95	25.15	25.2	25.02		24.9	26.03	25.22	24.71	26.15	24.19	26.31	23.93	25.07	25.6	25.57	24.51		24.96	24.69
rno-miR-337	19.95	19.9	19.87	19.42	19.99	19.45	19.84	19.73	19.89	19.98	19.72	19.56	19.86	19.74	20	19.5	19.41	19.76	20.03	19.94		19.85	20.01	20.07	19.8	20.54	20.74	20.61	19.36	20.01	20.16	19.66	19.78		19.42	19.98	20.37	19.89	20.43	19.61	21.03	19.44	19.58	20.16	20.04	19.42		19.68	19.47
rno-miR-341	14.91	14.74	15.14	15.06	15.13	14.76	15.26	14.63	14.94	14.94	15.03	14.95	15	14.94	14.94	14.92	14.89	14.8	14.99	15.13		14.27	14.45	14.72	14.82	15.09	15.3	15.87	15.02	14.74	14.59	14.83	14.93		14.47	14.5	14.53	15	14.81	14.5	15.19	14.76	14.51	14.43	14.75	14.98		14.89	15.09
rno-miR-343	40	40	40	40	39.96	38.47	55.02	42.68	40	40	40	40	39.99	39.99	39.99	39.99	39.99	39.99	39.99	39.99		40	40	40	40	54.63	38.56	54.59	40.56	40	40	40	40		40	40	40	40	41.63	37.59	39.18	39.67	40	40	40	40		40	40
rno-miR-344	19.82	19.66	19.79	19.75	19.76	19.45	19.75	20.04	19.71	19.91	19.75	19.71	19.85	19.7	19.92	19.55	19.65	19.67	19.88	19.82		19.34	19.86	19.42	19.28	20.41	20.49	20.25	19.5	19.82	19.91	19.74	19.8		19.03	20.04	19.56	19.39	20.27	19.63	20.69	19.87	19.71	20.02	19.75	19.74		19.3	20.07
rno-miR-345	15.15	14.88	15.06	14.92	15.05	15.1	15.09	14.66	15.01	15.11	15	14.94	14.94	14.98	15.05	15.01	15.13	15	14.96	14.88		15.25	15.23	15.65	15	15.72	15.64	15.5	14.72	15.1	15.22	14.94	15.07		15.43	15.38	15.42	15.07	16.17	15.32	16.03	15.22	14.95	15.16	15.28	15.1		15.41	15.07
rno-miR-346	18.63	18.57	18.1	18.09	18.44	18.02	18.7	18.11	18.47	18.49	18.21	18.21	18.4	18.31	18.34	18.23	18.28	18.37	18.2	18.43		18.3	18.46	18.41	18.25	19.01	18.77	18.81	18.2	18.51	18.77	18.55	18.36		18.6	18.69	18.32	18.47	19.37	18.54	19.13	18.42	18.9	18.96	18.77	18.74		18.31	18.65
rno-miR-347	26.44	26.16	25.46	26.09	25.85	25.37	25.65	29.53	26.95	26.11	25.79	25.54	25.9	26.04	26.3	25.79	25.27	25.69	26.48	27.36		25.66	25.88	26.35	25.75	26.79	26.25	27.44	28.74	26.92	27.18	26.68	26.48		26.46	26.42	25.93	25.95	26.78	26.41	27.86	27.57	27.57	27.28	26.55	26.13		25.68	26.13
rno-miR-349	29.29	29.13	27.75	26.52	32.06	31.31	25.86	32.64	27.67	27.75	27.72	27.77	27.75	27.75	27.75	27.75	27.75	27.75	27.75	27.75		26.37	26.71	28.11	23.74	56.05	32.77	56.01	32.91	27.66	27.68	27.71	27.72		30.42	27.22	31.8	25.76	56.06	30.36	32.08	56.35	27.7	27.64	27.73	27.72		26.27	27.01
rno-miR-34b	19.46	19.36	19.14	19.65	19.38	19.11	19.81	19.21	19.42	19.62	19.44	19.17	19.66	19.25	19.46	19.21	19.34	19.24	19.57	19.41		19.27	18.76	19.48	19.36	19.77	19.75	20.02	19.23	19.44	19.5	18.78	19.23		19.33	18.74	19.42	19.27	19.73	19.28	20.32	19.18	19.38	19.25	19.31	18.75		19.51	19.27
rno-miR-350	17.92	17.75	17.73	17.76	17.74	17.75	17.91	17.64	17.68	17.91	17.85	17.76	17.72	18.01	17.68	17.72	17.58	17.65	17.98	17.96		17.49	17.72	17.83	17.73	17.69	17.96	17.95	17.42	17.45	17.77	17.7	17.77		17.45	17.71	17.77	17.68	18.06	17.47	18.32	17.57	17.56	17.58	17.8	17.56		17.59	17.58
rno-miR-351	16.57	16.86	16.8	16.59	16.49	16.28	17.22	16.85	16.76	16.74	16.56	16.8	16.73	16.58	16.74	16.71	16.7	16.91	16.56	16.62		16.99	16.85	16.76	16.37	16	17.12	16.67	16.6	17.23	16.83	16.91	17		16.65	16.67	16.89	16.99	17.33	16.61	17.03	16.57	16.93	16.9	17.1	17.14		16.95	16.9
rno-miR-352	13.82	13.79	13.62	13.73	14.34	14.8	12.49	15.01	13.58	13.8	13.91	13.72	13.82	13.73	13.73	13.72	13.71	13.84	13.7	13.76		13.31	13.88	13.78	13.72	15.61	15.66	15.67	14.81	13.55	14.14	13.67	13.62		13.69	13.9	13.79	13.68	15.75	14.58	15.79	15.05	13.64	13.83	13.7	13.31		13.87	13.54
rno-miR-421	28.16	31.14	26.24	26.69	27.55	26.95	27.49	26.85	26.37	28.21	31.06	26.5	26.67	27.59	27.26	27.49	26.75	26.52	27.89	28.5		27.22	27.69	26.9	27	27.2	27.77	28.49	27.27	27.36	27.63	25.9	30.82		26.61	27.62	40	27.39	27.41	26.97	28.11	26.66	26.39	28.66	29.58	26.9		29.55	26.19
rno-miR-424	16.25	16.33	16.94	16.75	16.31	16.42	16.9	16.46	16.55	16.63	16.57	16.48	16.63	16.65	16.53	16.33	16.28	16.56	16.72	16.61		17.05	17.54	16.76	16.17	16.54	16.67	16.81	16.12	16.11	16.4	16.45	16.46		16.31	17.06	16.94	17.08	17.13	16.14	16.95	16.03	16.31	16.8	16.63	16.55		17	17.05
rno-miR-429	24.64	23.37	23.02	23.15	23.78	22.87	23.67	23.45	23.64	24.1	22.98	23.27	23.28	23.76	23.1	23.64	23.25	23.5	23.79	23.2		24.11	24.33	23.86	23.48	23.47	23.54	23.87	22.6	24.01	24.41	24.22	23.38		23.64	24.32	24.12	24.14	24.03	23.56	24.58	22.85	24.1	24.76	23.74	24.5		23.19	23.73
rno-miR-450	21.55	21.37	22.03	21.05	20.99	21.34	22.78	21.08	21.22	21.38	21.87	21.47	21.63	21.61	21.45	21.14	21.05	21.83	21.41	21.58		20.86	20.39	19.85	21.38	21.39	21.04	21.72	20.45	21.22	21.52	21.05	21.76		23.32	20.31	20.8	21.78	21.56	22.2	21.91	21.16	21.06	21.38	21.32	21.32		19.33	21.42
rno-miR-451	14.99	14.78	15.55	14.84	15.29	14.62	15.22	14.9	15.22	15.28	15.04	14.64	14.82	15.4	15.14	14.75	14.92	14.75	15.21	15.19		14.7	15.16	15.14	15.6	15.18	15.92	15.66	14.21	14.94	15.46	14.9	14.72		15.44	14.62	14.98	14.49	15.85	15	16.26	14.26	14.94	15.19	15.25	14.95		14.99	14.78
rno-miR-483	15.8	16.45	16.55	16.7	15.28	16.55	17.6	16.6	16.25	16.21	16.52	16.4	16.39	16.37	16.32	16.18	16.37	16.2	16.33	16.36		17.5	16.99	16.48	16.38	17.11	16.9	16.69	16.28	17.07	17.03	16.96	15.74		16.6	16.33	16.8	16.63	17.66	16.83	17.43	16.1	16.9	16.86	16.9	16.05		16.88	17.34
rno-miR-7	16.33	16.26	16.07	15.97	17	15.44	16.45	16.08	16.21	16.27	16.38	15.86	16.49	16.41	16.59	15.44	15.51	15.75	16.73	17.27		16.41	17.4	16.6	16.99	17.2	18.43	18.72	15.35	15.14	15.17	14.5	15.86		16.46	16.29	16.64	16.53	17.63	17.2	18.3	16.88	14.53	15.09	15.33	14.75		17.08	17.07
rno-miR-7*	14.5	13.84	13.98	14.04	14.31	14.19	13.59	14.27	14.15	14.22	14.01	13.96	14.1	14.04	14.19	13.97	14.06	14.06	14.1	14.06		14.42	14.69	14.84	14.42	14.76	14.72	14.61	14.13	13.95	14.36	14.07	14.1		14.97	14.21	14.65	14.29	14.9	14.12	14.95	14.46	14.34	14.34	13.84	13.8		14.51	14.42
rno-miR-7b	14.01	13.84	13.82	13.77	13.48	13.31	16.26	13.59	14.2	13.5	14.93	13.37	14.19	13.82	14.14	13.39	13.23	13.72	14.27	14.5		14.67	14.2	13.88	14.07	14.46	14.32	13.6	13.18	12.34	12.76	11.93	13.38		13.71	14.09	14.24	14.13	14.95	13.87	14.25	13.39	12.01	12.69	13.11	12.23		14.31	14.18
rno-miR-93	13.32	13.23	13.3	13.98	13.59	13.61	12.98	13.58	13.29	13.48	13.52	13.47	13.43	13.43	13.43	13.42	13.56	13.42	13.39	13.36		13.5	13.31	13.51	13.46	10.24	13.44	13.79	13.6	13.47	13.57	13.54	13.47		14.1	13.48	13.47	13.93	14.36	13.52	14.06	13.42	13.65	13.37	13.45	13.43		13.93	13.57
rno-miR-96	32.53	35.83	27.28	27.81	27.57	29.26	29.49	28.22	28.23	28.79	28.44	28.57	28.34	28.44	28.21	29	28.61	28.19	29.13	28.15		30.08	28.07	24.97	31.57	27.95	27.39	27.42	27.41	28.94	27.89	30.6	29.46		30.93	27.71	28.76	25.88	28.17	27.97	27.27	28.48	28.9	28.95	28.64	29.49		26.02	30.75
[truncated: 22 more columns]
